# Supplementary material for: Copy Number Variation Pattern for Discriminating MACROD2 States of Colorectal Cancer Subtypes
Source: Front Bioeng Biotechnol. 2019 Dec 19;7:407. doi: 10.3389/fbioe.2019.00407 (PMC6930883; doi:10.3389/fbioe.2019.00407)
Supplement: Table S1 — Ranked features with MaxRel scores for CRC stage with BAF. [file Table_1.XLSX]

## Sheet: Sheet1
Table S1. Ranked features with MaxRel scores for CRC stage with BAF
Order	Feature
1	rs5971808
2	rs2831186
3	rs9288651
4	rs10884100
5	rs4394988
6	rs7565016
7	rs4645427
8	rs4744610
9	rs1022234
10	rs17239618
11	rs12279224
12	rs1474250
13	rs6525877
14	rs35498538
15	rs17170068
16	rs525157
17	rs10967894
18	rs12882412
19	rs2238419
20	rs451345
21	rs2367957
22	rs1718053
23	rs890599
24	rs2270820
25	rs9522824
26	rs4663545
27	rs780104
28	rs3929252
29	rs12997287
30	rs2725466
31	rs1965946
32	rs4622658
33	rs7590461
34	rs1415974
35	rs12593947
36	rs9927231
37	rs6533710
38	rs1785512
39	rs7994222
40	rs7102217
41	rs2509943
42	rs6938886
43	rs5029471
44	rs2969070
45	rs12128329
46	rs1646691
47	rs4741775
48	rs5921077
49	rs4353249
50	rs627538
51	rs6725704
52	rs10218266
53	rs1035833
54	rs7308500
55	rs165599
56	rs17705745
57	rs7179869
58	rs7207689
59	rs4766163
60	rs4703774
61	rs3805004
62	rs4257708
63	rs9658966
64	rs5029472
65	rs4831030
66	rs655683
67	rs3922490
68	rs10260554
69	rs10956694
70	rs2081745
71	rs2887370
72	rs13407231
73	rs1730833
74	rs2648197
75	rs1160742
76	rs4659682
77	rs12510260
78	rs10784370
79	rs7326323
80	rs2670371
81	rs8087804
82	rs1523192
83	rs7304081
84	rs4763825
85	rs3731828
86	rs1544623
87	rs1727972
88	rs2622436
89	rs17281991
90	rs1647266
91	rs17514360
92	rs6500870
93	rs3852577
94	rs11858113
95	rs6102934
96	rs1435633
97	rs2235674
98	rs688630
99	rs10902222
100	rs2555622
101	rs4901823
102	rs7616625
103	rs17312951
104	rs2272256
105	rs6671983
106	rs984230
107	rs1603389
108	rs6854472
109	rs2818050
110	rs12148198
111	rs12902190
112	rs1835338
113	rs4773546
114	rs5973141
115	rs388942
116	rs4148899
117	rs11059567
118	rs3752670
119	rs2035073
120	rs12668416
121	rs2616248
122	rs3736968
123	rs2169325
124	rs2769628
125	rs7605933
126	rs11721252
127	rs2800
128	rs11754662
129	rs2944476
130	rs12361327
131	rs2671142
132	rs9860922
133	rs2829505
134	rs1676891
135	rs199848
136	rs7252224
137	rs4933902
138	rs9307238
139	rs1054899
140	rs4832485
141	rs13053993
142	rs2116047
143	rs9358202
144	rs7535533
145	rs5907636
146	rs1011308
147	rs7999510
148	rs4778036
149	rs6854437
150	rs10837883
151	rs12612
152	rs331596
153	rs9900778
154	rs4803
155	rs7552260
156	rs1565947
157	rs10814059
158	rs1017366
159	rs12009450
160	rs7017907
161	rs2543154
162	rs6678247
163	rs4760557
164	rs10306
165	rs7126447
166	rs3786355
167	rs2381530
168	rs1265296
169	rs17828130
170	rs760827
171	rs7883067
172	rs523604
173	rs16932084
174	rs7142315
175	rs9381416
176	rs2673798
177	rs2931883
178	rs2836001
179	rs6464696
180	rs4414862
181	rs1024694
182	rs1867533
183	rs561712
184	rs1094787
185	rs3846382
186	rs7198577
187	rs1014805
188	rs914238
189	rs6746142
190	rs13403411
191	rs9509528
192	rs9319269
193	rs6547906
194	rs10850596
195	rs4867032
196	rs7662084
197	rs4076036
198	rs1328500
199	rs557771
200	rs400627
201	rs549386
202	rs2028898
203	rs10241121
204	rs10442369
205	rs780106
206	rs13079078
207	rs1454466
208	rs681725
209	rs6931675
210	rs1866242
211	rs5925155
212	rs332925
213	rs7697652
214	rs6805548
215	cnvi0005656
216	rs4450748
217	rs7681769
218	rs12331383
219	rs1145785
220	rs9492123
221	rs4468469
222	rs1569807
223	rs6488089
224	rs8092641
225	rs17136624
226	rs7881794
227	rs6766993
228	rs11629075
229	rs2273574
230	rs2854521
231	rs1255395
232	rs1629174
233	rs12693099
234	rs3008964
235	rs4615645
236	rs17541479
237	rs1888920
238	rs2225215
239	rs7618715
240	rs6642698
241	rs12132682
242	rs555513
243	rs5950534
244	rs1647276
245	cnvi0011683
246	rs4857461
247	rs721577
248	rs16847132
249	rs10771973
250	rs6609257
251	rs2073828
252	rs9314991
253	rs1820076
254	rs1757691
255	rs2299971
256	rs7884358
257	rs726298
258	rs6432515
259	rs10493633
260	rs7844834
261	rs10033784
262	rs454066
263	rs524400
264	rs9290883
265	rs7564113
266	rs7563783
267	cnvi0006576
268	rs6585586
269	rs5930900
270	rs1815085
271	rs4235106
272	rs2214876
273	rs4436186
274	rs1202543
275	rs1900647
276	rs12550726
277	rs7654310
278	rs10751603
279	rs5908057
280	rs10493825
281	rs1951004
282	rs4679639
283	rs9355987
284	rs10746022
285	rs9530810
286	rs854642
287	rs2412544
288	rs2896905
289	rs2799933
290	rs1242923
291	rs6932890
292	rs10845539
293	rs1992809
294	rs884277
295	rs4832067
296	rs6674086
297	rs4890812
298	rs6781822
299	rs3763619
300	rs12835146
301	rs3743372
302	rs12135167
303	rs9268256
304	rs625527
305	rs4015690
306	rs5982396
307	rs11716158
308	rs12787863
309	rs10170288
310	rs12682469
311	rs4377895
312	rs11728634
313	rs16869330
314	rs1521952
315	rs232368
316	rs2055497
317	rs10992260
318	rs7313765
319	rs13324208
320	rs9464650
321	rs9865258
322	rs7997642
323	rs6626302
324	rs11025438
325	rs704791
326	rs11077032
327	rs9494850
328	rs2271139
329	rs7560625
330	rs2051934
331	rs4550967
332	rs2470697
333	rs420863
334	rs4698669
335	rs1630816
336	rs10800627
337	rs10177878
338	rs7860377
339	rs661241
340	rs10511012
341	rs2784890
342	rs3132117
343	rs5923944
344	rs693534
345	rs12924838
346	rs9877833
347	rs1881904
348	rs2540765
349	rs2050986
350	rs4829892
351	rs6080974
352	rs1355925
353	rs1915061
354	rs4588087
355	rs2303852
356	rs845570
357	rs600455
358	rs667482
359	rs961088
360	rs11159891
361	rs5970701
362	rs886757
363	rs7162035
364	MitoC15834T
365	rs2157787
366	rs9848859
367	rs1260345
368	rs6806061
369	rs2552061
370	rs7966349
371	rs4467300
372	rs1565843
373	rs6746008
374	rs4663414
375	rs2788279
376	rs10513287
377	rs2829538
378	rs2597576
379	rs1495608
380	rs2392862
381	rs766100
382	rs7792744
383	rs621560
384	rs2835991
385	rs1452515
386	rs2158654
387	rs9302755
388	rs2008073
389	rs1796915
390	rs995298
391	rs7627904
392	rs12844697
393	rs1544465
394	rs2185008
395	rs599837
396	rs1359637
397	rs1322219
398	rs1398887
399	rs11054914
400	rs9847678
401	rs7686222
402	rs11247079
403	rs7195405
404	rs1556188
405	rs470747
406	rs2014146
407	rs1421998
408	rs2957637
409	rs2538039
410	rs4233201
411	rs12500507
412	rs4852557
413	rs7923344
414	rs1255413
415	rs2253313
416	rs1921548
417	rs10119913
418	rs10755966
419	rs4926659
420	rs2272417
421	rs475992
422	rs641052
423	rs9521826
424	rs3789433
425	rs17139612
426	rs440656
427	rs6473520
428	rs2250334
429	rs1317040
430	rs10265730
431	rs6456494
432	rs1349841
433	rs12577477
434	rs10250329
435	rs11668636
436	rs2143463
437	rs9018
438	rs9855119
439	rs10145210
440	rs6853611
441	rs2500515
442	rs11125183
443	rs2283484
444	rs7880350
445	rs1562245
446	rs1160741
447	rs4939560
448	rs10062990
449	rs2036539
450	rs12565681
451	rs12313095
452	rs34682899
453	rs11078031
454	rs6442701
455	rs6487373
456	rs1744169
457	rs1857883
458	cnvi0008649
459	rs10118850
460	rs2122943
461	rs696831
462	rs1870216
463	rs1260342
464	rs304761
465	rs1024361
466	rs870875
467	rs361262
468	rs12642221
469	rs5979685
470	rs6936346
471	rs7998884
472	rs1873059
473	rs1958706
474	rs12395343
475	rs656750
476	rs7465686
477	rs5926351
478	rs10476898
479	rs174306
480	rs1911338
481	rs6710298
482	rs2815496
483	rs2943501
484	rs6511380
485	rs6953445
486	rs11660099
487	rs17157942
488	rs11108905
489	rs2013516
490	rs5954447
491	rs2033544
492	rs877905
493	rs12459084
494	rs3804476
495	rs1472118
496	rs2720232
497	rs4132975
498	rs3206834
499	rs2439430
500	rs346480
501	rs2033316
502	rs2045316
503	rs3819101
504	rs4691544
505	rs6973946
506	rs7832205
507	rs1866204
508	rs4848902
509	rs11681351
510	rs2147345
511	rs6787984
512	rs7506639
513	rs1232779
514	rs1851390
515	rs11646233
516	rs9918216
517	rs5910940
518	rs7587076
519	rs2075633
520	rs11637906
521	rs13332373
522	rs4245496
523	rs2029461
524	rs548379
525	cnvi0004895
526	rs4523040
527	rs2251717
528	rs17107403
529	rs6955302
530	rs2238663
531	rs8028537
532	rs6483341
533	rs1046706
534	rs10152146
535	rs9897736
536	rs11080266
537	rs12795125
538	rs587935
539	rs4884008
540	rs2075755
541	rs4570291
542	rs718939
543	rs10846235
544	rs1541064
545	rs2890426
546	rs3817982
547	rs9394963
548	rs12955729
549	rs12626011
550	rs1553499
551	cnvi0022947
552	rs7965899
553	rs3910222
554	rs11915544
555	rs9572569
556	rs1913940
557	rs618760
558	rs7807193
559	rs723049
560	rs474668
561	rs1187482
562	rs1434194
563	rs6611276
564	rs742408
565	rs185493
566	rs7668794
567	rs1901388
568	rs7406843
569	rs7180391
570	rs7666758
571	rs10172733
572	rs2390201
573	rs2878373
574	rs1055497
575	rs6480919
576	rs6497888
577	rs2365999
578	rs2146905
579	rs2110394
580	rs6717962
581	rs4817242
582	rs888285
583	rs4906666
584	rs7935
585	rs4934089
586	rs930019
587	rs12435210
588	rs7976866
589	rs1272436
590	rs1595411
591	rs7938157
592	rs3734398
593	rs10245961
594	rs1980243
595	rs5951805
596	rs3844086
597	rs9871128
598	rs11896300
599	rs1217957
600	cnvi0016713
601	rs1994374
602	rs2161783
603	rs139753
604	rs1478526
605	rs2013102
606	rs4766329
607	rs6527642
608	rs6777784
609	rs859202
610	rs7337720
611	rs10108465
612	rs10885362
613	rs7467327
614	rs3756345
615	rs2138077
616	rs11074275
617	rs10520724
618	rs8065651
619	rs7698003
620	rs1393990
621	rs6497145
622	rs9950483
623	rs2033377
624	rs1972644
625	rs4633757
626	rs2019363
627	rs10494518
628	rs4948060
629	rs164475
630	rs12395723
631	rs28848473
632	rs527346
633	rs1317171
634	rs10518494
635	cnvi0011939
636	rs1255396
637	rs4708064
638	rs10784359
639	rs2026821
640	rs7764196
641	rs12726
642	rs2274647
643	rs12194869
644	rs9314990
645	rs2254428
646	rs1129839
647	rs6099454
648	rs797175
649	rs879900
650	rs11945232
651	rs8051403
652	rs2682405
653	rs7976243
654	rs2238973
655	rs3910264
656	rs6804071
657	rs12023161
658	rs7941030
659	rs1848
660	rs538524
661	rs683011
662	rs605089
663	rs1921406
664	rs202516
665	rs3107541
666	rs2648228
667	rs2186251
668	rs675010
669	rs4024193
670	rs289726
671	rs4641763
672	rs4615045
673	rs10449303
674	rs1890609
675	rs9374710
676	rs5019445
677	rs1040508
678	rs10774816
679	rs3847554
680	rs1030661
681	rs4827342
682	rs8007588
683	rs7778697
684	rs1808891
685	rs13260133
686	rs1223045
687	rs7887024
688	rs11073654
689	rs17115614
690	rs3760371
691	rs4073844
692	rs2906176
693	rs378138
694	rs2124811
695	rs7797354
696	rs4784182
697	rs6003645
698	rs4795731
699	rs2863695
700	rs619773
701	rs760609
702	rs1914716
703	rs7311031
704	rs634371
705	rs10249014
706	rs7998402
707	rs9594159
708	rs7230529
709	rs12665478
710	rs1028674
711	rs1270146
712	rs1488745
713	rs13155650
714	rs4147719
715	rs9458975
716	rs11785479
717	rs561703
718	rs1214558
719	rs10825321
720	rs4291034
721	rs1887677
722	rs6417903
723	rs8026605
724	rs1107827
725	rs2448050
726	rs16842293
727	rs7136388
728	rs13060371
729	rs3135219
730	rs7162031
731	rs2278968
732	rs53380
733	rs7903081
734	rs1013292
735	rs2918343
736	rs2219193
737	rs7730218
738	rs4706852
739	rs345056
740	rs1189402
741	rs5975665
742	rs132717
743	rs7003297
744	rs235913
745	rs6899499
746	rs12289833
747	rs1687626
748	rs7602534
749	rs2749172
750	rs10745363
751	rs11770878
752	rs846397
753	rs965323
754	rs206956
755	rs210676
756	rs4100261
757	rs2202562
758	rs4834919
759	rs10939587
760	rs4827169
761	rs17056898
762	rs594561
763	rs7956824
764	rs1994524
765	rs12594226
766	rs13169813
767	rs355185
768	rs10933379
769	rs6419191
770	rs4243279
771	rs139756
772	rs9422277
773	rs6958172
774	rs7598832
775	rs7874335
776	rs2540759
777	rs12369825
778	rs445464
779	rs776854
780	rs485774
781	rs11797996
782	rs4733476
783	rs2689553
784	rs9468914
785	rs7965447
786	rs6444592
787	rs11129250
788	rs6550235
789	rs2981157
790	rs1463184
791	rs7294479
792	rs8097308
793	rs11708487
794	rs4971626
795	rs2634096
796	rs11134155
797	rs4888173
798	cnvi0004720
799	rs346475
800	rs7806357
801	rs690759
802	rs11049809
803	rs12696601
804	rs6693644
805	rs9809600
806	rs6457301
807	rs1841377
808	rs615007
809	rs3913471
810	rs6734103
811	rs754858
812	rs3744583
813	rs6494560
814	rs6937168
815	rs10862392
816	rs2404573
817	rs1479172
818	rs9645172
819	rs4709050
820	rs1569699
821	rs4820556
822	rs1993956
823	rs12921046
824	rs6559497
825	rs4415295
826	rs1951865
827	rs13129771
828	rs604711
829	rs11685198
830	rs1499512
831	rs9461082
832	rs7014106
833	rs5980177
834	rs669032
835	rs4461066
836	rs5971788
837	rs10104738
838	rs952901
839	rs2812190
840	rs11220057
841	rs7696397
842	rs2513638
843	rs1147917
844	rs6075489
845	rs1909749
846	rs2406669
847	rs570403
848	rs7767531
849	rs1989805
850	rs2026612
851	rs1513412
852	rs12196723
853	rs9510802
854	rs7984814
855	rs1020740
856	rs2517450
857	rs10734689
858	rs9947661
859	rs2321178
860	rs4129294
861	rs12607181
862	rs8013673
863	rs1006467
864	rs10966854
865	rs2634114
866	rs454999
867	rs499952
868	rs2122623
869	rs2891226
870	rs2746028
871	rs13339094
872	rs7924316
873	rs4424360
874	rs882059
875	rs5932588
876	rs761187
877	rs10170603
878	rs10764855
879	rs6486674
880	rs4401473
881	rs6536171
882	rs4242952
883	rs2849015
884	rs6489769
885	rs515384
886	rs35047458
887	rs2637451
888	rs10830200
889	rs6826085
890	rs5751901
891	rs1077773
892	rs6715398
893	rs2904473
894	rs513474
895	rs2170780
896	rs2108726
897	rs1983688
898	rs11071435
899	rs4601080
900	rs813321
901	rs10502347
902	rs1969239
903	rs11208433
904	rs917231
905	rs329675
906	rs7034952
907	rs574430
908	rs1542429
909	rs1012093
910	rs4569852
911	rs4888158
912	rs6039524
913	rs1923880
914	rs7769230
915	rs12957550
916	rs10870946
917	rs16867808
918	rs2496540
919	rs202248
920	rs4829323
921	rs10776815
922	rs10208273
923	rs3011731
924	rs3743501
925	rs1457303
926	rs2862343
927	rs614616
928	rs4709579
929	rs11753049
930	rs7592135
931	rs12954993
932	rs12373053
933	rs1031996
934	rs2166706
935	rs1040509
936	rs8104214
937	rs9806404
938	rs9407764
939	rs1419386
940	rs11602493
941	rs3826689
942	rs3822528
943	rs2065551
944	rs4858660
945	rs12975850
946	rs2675380
947	rs11222874
948	rs10938341
949	rs17801787
950	rs10971585
951	rs661893
952	rs7558722
953	rs17541315
954	rs717240
955	rs745749
956	rs4785102
957	rs9565968
958	rs9503288
959	rs11718678
960	rs10930413
961	rs139142
962	rs9380167
963	rs2359126
964	rs3754446
965	rs6066549
966	rs926594
967	rs13230456
968	rs7031754
969	rs4711900
970	rs657773
971	rs625476
972	rs1852612
973	rs10893019
974	rs12572759
975	rs9538624
976	rs5905216
977	rs2413987
978	rs13276104
979	rs9991484
980	rs11731086
981	rs10813766
982	rs1291695
983	rs11821383
984	rs876964
985	rs12436407
986	rs991985
987	rs2521414
988	rs12969440
989	rs4362858
990	rs11717739
991	rs1459930
992	rs2650084
993	rs2767419
994	rs10826196
995	rs12105272
996	rs4731336
997	rs2216325
998	rs12437784
999	rs4965619
1000	rs3883882
1001	rs3925535
1002	rs4471434
1003	rs7559191
1004	rs12987596
1005	rs3848864
1006	rs4478233
1007	rs76616
1008	rs1364246
1009	rs2474875
1010	rs4820378
1011	rs1892534
1012	rs1415446
1013	cnvi0018228
1014	rs1154960
1015	rs520336
1016	rs858671
1017	rs4973062
1018	rs886542
1019	rs4364258
1020	rs1111471
1021	rs2505172
1022	rs12314737
1023	rs17834947
1024	rs7358977
1025	rs9696872
1026	rs1403069
1027	cnvi0000858
1028	rs285809
1029	rs7294633
1030	rs2070706
1031	rs7061782
1032	rs2305529
1033	rs345206
1034	rs724809
1035	rs2249535
1036	rs6954585
1037	rs807423
1038	rs11764618
1039	rs32181
1040	rs2290272
1041	rs7341475
1042	rs1583483
1043	rs174335
1044	rs13130965
1045	rs1875371
1046	rs7623750
1047	rs3922743
1048	rs6476514
1049	rs1453666
1050	rs6663746
1051	rs6937593
1052	rs517871
1053	rs3787538
1054	rs899442
1055	rs4857458
1056	rs1033500
1057	rs1415342
1058	rs2026432
1059	rs7674870
1060	rs7591632
1061	rs11907901
1062	rs4981950
1063	rs10855652
1064	rs6442177
1065	rs993161
1066	rs6571577
1067	rs6531170
1068	rs10922362
1069	rs12111295
1070	rs4945375
1071	rs10496039
1072	rs11074761
1073	rs6063186
1074	rs3796283
1075	rs7781772
1076	rs8112773
1077	rs1036270
1078	rs2432053
1079	rs7967621
1080	rs1861301
1081	rs1983180
1082	rs1662298
1083	rs96358
1084	rs5904817
1085	rs807882
1086	rs4128154
1087	rs12596363
1088	rs3853291
1089	rs1334958
1090	rs2746971
1091	rs11580678
1092	rs11952452
1093	rs8083017
1094	rs1014723
1095	rs9342097
1096	rs1869624
1097	rs13120896
1098	rs6503796
1099	rs1178099
1100	rs2264844
1101	rs9396778
1102	rs2931261
1103	rs4793125
1104	rs10755873
1105	rs7022253
1106	rs13074062
1107	rs4938268
1108	rs6440971
1109	rs473709
1110	rs6079325
1111	rs4129498
1112	rs7710680
1113	rs7497612
1114	rs598758
1115	cnvi0002562
1116	rs1461067
1117	rs7539855
1118	rs8074984
1119	rs2076932
1120	rs2884208
1121	rs5966868
1122	rs7709089
1123	rs7961471
1124	rs535801
1125	rs1472169
1126	rs1646667
1127	rs2249732
1128	rs4285452
1129	rs1399107
1130	rs4446858
1131	rs6881634
1132	rs7976497
1133	rs1556010
1134	rs7313825
1135	cnvi0008058
1136	rs1003538
1137	rs4572442
1138	rs6979016
1139	rs6086972
1140	rs1438959
1141	rs7742591
1142	rs2514961
1143	rs7560740
1144	rs9267956
1145	rs2838965
1146	rs670603
1147	rs6417699
1148	rs428073
1149	rs10865432
1150	rs2038037
1151	rs1344485
1152	rs11012358
1153	rs13307312
1154	rs7058416
1155	rs3746337
1156	rs7164595
1157	rs8179838
1158	rs12120609
1159	rs10252228
1160	rs3130647
1161	rs12449079
1162	rs361279
1163	rs9347790
1164	rs729218
1165	rs7760944
1166	rs1037445
1167	rs13019824
1168	rs919900
1169	rs638518
1170	rs1026420
1171	rs479932
1172	rs1235590
1173	rs3213562
1174	rs10492291
1175	rs9275698
1176	rs12128758
1177	rs4642012
1178	rs4374247
1179	rs10169752
1180	rs1056131
1181	rs1348355
1182	rs35293056
1183	rs2278751
1184	rs4558266
1185	rs7602460
1186	rs7830490
1187	rs10784353
1188	rs2158641
1189	rs7655712
1190	rs7529824
1191	rs12504229
1192	rs708914
1193	rs1333682
1194	rs9867153
1195	rs676584
1196	rs10820650
1197	rs4795567
1198	rs773920
1199	rs12184524
1200	rs4274812
1201	rs11075260
1202	rs8119501
1203	rs2799939
1204	rs17773430
1205	rs7101163
1206	rs7571452
1207	rs35674183
1208	rs4389979
1209	rs4505390
1210	rs9819617
1211	rs4712955
1212	rs7621369
1213	rs2887372
1214	rs7144
1215	rs2068800
1216	rs6969660
1217	rs239498
1218	rs13204280
1219	rs34100431
1220	rs2156545
1221	rs1384883
1222	rs3911998
1223	rs2695219
1224	cnvi0008906
1225	rs1205429
1226	rs10804581
1227	rs8040847
1228	rs2536085
1229	rs2909111
1230	rs1535798
1231	rs3817442
1232	rs13064045
1233	rs1534151
1234	rs5978280
1235	rs2880608
1236	rs2535289
1237	rs10152023
1238	rs9853831
1239	rs7304868
1240	rs4095484
1241	rs776501
1242	rs10496793
1243	rs10771281
1244	rs1508475
1245	rs11027305
1246	rs10782213
1247	rs552339
1248	rs139838
1249	rs5904832
1250	rs1442436
1251	rs4972235
1252	rs9376393
1253	rs2956913
1254	rs7278536
1255	rs7755298
1256	rs7218126
1257	rs4475568
1258	rs3848999
1259	rs2676914
1260	rs9855624
1261	rs12479920
1262	rs664188
1263	rs10846155
1264	rs1126179
1265	rs7848022
1266	rs1232241
1267	rs591849
1268	rs10899918
1269	rs2815605
1270	rs7021743
1271	rs1430895
1272	rs6835127
1273	rs1549203
1274	rs11649508
1275	rs2036741
1276	rs11823870
1277	rs7962495
1278	rs2045582
1279	rs10511515
1280	rs2331992
1281	rs10849605
1282	cnvi0000818
1283	rs1196751
1284	rs4968318
1285	rs4829326
1286	rs10005074
1287	rs10905983
1288	rs713572
1289	rs1357159
1290	rs1445541
1291	rs4076358
1292	rs11119758
1293	rs12600272
1294	rs6735860
1295	rs1474092
1296	rs8019939
1297	rs12970980
1298	rs4538568
1299	rs13436213
1300	rs11540416
1301	rs989580
1302	rs1333072
1303	rs1327314
1304	rs12227997
1305	rs565571
1306	rs7183943
1307	rs7515865
1308	rs3812152
1309	rs12904825
1310	rs1428514
1311	rs16929946
1312	rs12595258
1313	rs12149602
1314	rs1144863
1315	rs1944764
1316	rs1324095
1317	rs12507327
1318	rs2107172
1319	rs12197370
1320	rs1537377
1321	rs6797405
1322	rs3843276
1323	rs11581470
1324	rs4865468
1325	rs708777
1326	rs1295932
1327	rs3770317
1328	rs1369166
1329	rs10803047
1330	rs1521806
1331	rs10794989
1332	rs9409096
1333	rs6770252
1334	rs7082468
1335	rs9290264
1336	rs26979
1337	rs2211651
1338	rs11755451
1339	rs206037
1340	rs9285516
1341	rs2396242
1342	rs2273595
1343	rs9948128
1344	rs10918695
1345	rs10947121
1346	rs12673911
1347	rs9513260
1348	rs11717983
1349	rs6435267
1350	rs592121
1351	rs11100269
1352	rs1718049
1353	rs10108742
1354	rs5750482
1355	rs4484319
1356	rs7861755
1357	rs649460
1358	rs854779
1359	rs7674937
1360	rs12539924
1361	rs8097792
1362	rs13420432
1363	rs7930940
1364	rs2499730
1365	rs4704495
1366	rs8077392
1367	rs4823838
1368	rs9268368
1369	rs11199430
1370	rs845189
1371	rs11244632
1372	rs251018
1373	rs364675
1374	rs4327570
1375	rs2211720
1376	rs13310293
1377	rs4304977
1378	rs2523002
1379	rs10770938
1380	rs9495424
1381	rs2718926
1382	rs6966421
1383	rs1546049
1384	rs1193510
1385	rs11956421
1386	rs2834549
1387	rs4504228
1388	rs6119185
1389	rs1868220
1390	rs6799163
1391	rs12515303
1392	rs1364096
1393	rs3978768
1394	rs9920375
1395	rs1839473
1396	rs12494623
1397	cnvi0015473
1398	rs11765988
1399	rs3811723
1400	rs1216491
1401	rs2269169
1402	rs4545912
1403	rs10084013
1404	rs1380061
1405	rs10225295
1406	rs6921502
1407	rs3176774
1408	rs1938539
1409	rs3826536
1410	rs4625411
1411	rs7053108
1412	rs7687806
1413	rs6936792
1414	rs12664754
1415	rs12794326
1416	rs695161
1417	rs5939063
1418	rs6589938
1419	rs12151827
1420	rs12624843
1421	rs1064191
1422	rs6450425
1423	rs12567677
1424	rs11646341
1425	cnvi0002869
1426	rs1008446
1427	rs2686488
1428	rs7863982
1429	rs516647
1430	rs547261
1431	rs4724603
1432	rs2346710
1433	rs2304731
1434	rs4416821
1435	rs962974
1436	rs6915298
1437	rs2590688
1438	rs12724388
1439	rs1437690
1440	rs7354930
1441	rs12156850
1442	rs6541725
1443	rs11063631
1444	rs12453262
1445	rs35644973
1446	cnvi0002850
1447	rs4504158
1448	rs265552
1449	rs4730685
1450	rs491995
1451	rs4697450
1452	rs9311538
1453	rs2660034
1454	rs10457095
1455	rs5935567
1456	rs1240649
1457	rs3924446
1458	rs309271
1459	rs954072
1460	rs17077987
1461	rs230528
1462	rs12444808
1463	rs6430636
1464	rs10789439
1465	rs6137352
1466	rs7102845
1467	rs7307375
1468	rs6756261
1469	rs16871677
1470	rs10463492
1471	rs709274
1472	rs13082867
1473	rs852417
1474	rs8087079
1475	rs8042941
1476	rs900253
1477	rs6003649
1478	rs491106
1479	rs4234497
1480	rs10845868
1481	rs202493
1482	rs28455004
1483	rs1544953
1484	rs1083130
1485	rs2339654
1486	rs4552231
1487	rs7571016
1488	rs10032478
1489	rs2710642
1490	rs7073183
1491	rs2182758
1492	rs2047166
1493	rs11745722
1494	rs992276
1495	rs533885
1496	rs4783744
1497	rs1330975
1498	rs17131473
1499	rs9821020
1500	rs4690113
1501	rs5934024
1502	rs9851393
1503	rs4714882
1504	rs903209
1505	rs2229562
1506	rs992457
1507	rs1919430
1508	rs3849603
1509	rs1740721
1510	rs4780082
1511	rs2031878
1512	rs7410750
1513	rs10462299
1514	rs644582
1515	rs281259
1516	rs2216638
1517	rs3906509
1518	rs10490264
1519	rs1016873
1520	rs10848033
1521	rs7007618
1522	rs807897
1523	rs6731173
1524	rs9603837
1525	rs2746111
1526	rs7621196
1527	rs717932
1528	rs6134228
1529	rs1570069
1530	rs10073948
1531	rs1206980
1532	rs899178
1533	rs287849
1534	rs7230288
1535	rs11132268
1536	rs11094927
1537	rs1126214
1538	rs1473221
1539	rs7505175
1540	rs683180
1541	rs972444
1542	rs795484
1543	rs2390601
1544	rs7956015
1545	rs231697
1546	rs738776
1547	rs5911744
1548	rs4623810
1549	rs3859521
1550	rs1428806
1551	rs4741619
1552	rs16854271
1553	rs1148266
1554	rs3124517
1555	rs1265273
1556	rs6598829
1557	rs1395787
1558	rs7638534
1559	rs2283708
1560	rs3804464
1561	rs11183395
1562	rs7387793
1563	rs2062882
1564	rs3799037
1565	rs12533666
1566	rs10112358
1567	rs6756323
1568	rs540093
1569	rs10771951
1570	cnvi0012828
1571	rs4800587
1572	rs2736062
1573	rs16933
1574	rs17690723
1575	rs6778525
1576	rs1435609
1577	rs1468743
1578	rs9959259
1579	rs3823842
1580	rs2466293
1581	rs3826537
1582	rs779033
1583	rs10756949
1584	rs628117
1585	rs6610845
1586	rs7747078
1587	rs3783698
1588	rs6074460
1589	rs483481
1590	rs9784949
1591	rs7089424
1592	rs7597935
1593	rs9520447
1594	rs4908967
1595	rs2982396
1596	rs4901824
1597	rs10848536
1598	rs34487584
1599	rs10993052
1600	rs7074175
1601	rs574165
1602	rs10458862
1603	rs7301036
1604	rs6808205
1605	rs11853413
1606	rs2757095
1607	rs3755105
1608	rs1688615
1609	rs1028997
1610	rs12919731
1611	rs10878089
1612	rs1892361
1613	rs12778749
1614	rs11781564
1615	rs2589847
1616	rs5945484
1617	rs934510
1618	rs1762506
1619	rs1885211
1620	rs11909066
1621	rs4855405
1622	rs4835586
1623	rs167648
1624	rs10028606
1625	rs576184
1626	rs7982860
1627	rs6003648
1628	rs1462147
1629	rs4714885
1630	rs2185268
1631	rs2225471
1632	rs10087419
1633	rs10786621
1634	rs10831027
1635	rs1493132
1636	rs4614139
1637	rs4340119
1638	rs4298137
1639	rs477424
1640	rs2375016
1641	rs6840362
1642	rs4264554
1643	rs7799010
1644	rs10759178
1645	rs2374041
1646	rs7609918
1647	rs13030883
1648	rs731284
1649	rs5768405
1650	rs3752430
1651	rs2058706
1652	rs4637240
1653	rs16826658
1654	rs11185168
1655	rs7203498
1656	rs10520520
1657	rs9661467
1658	rs7653928
1659	rs1815182
1660	rs502000
1661	rs963140
1662	rs17236946
1663	rs995239
1664	rs8011582
1665	rs5921261
1666	rs6763648
1667	rs2495312
1668	rs1378472
1669	rs399282
1670	rs17236525
1671	rs10789387
1672	rs7950153
1673	rs6898116
1674	rs9521733
1675	rs4756052
1676	rs2061443
1677	rs13218772
1678	rs4888181
1679	rs2777860
1680	rs178858
1681	rs630869
1682	rs2489798
1683	rs2298419
1684	rs8105737
1685	rs1592890
1686	rs12962127
1687	rs2505952
1688	rs8182119
1689	rs1763983
1690	rs11072420
1691	rs4279283
1692	rs7798936
1693	rs12329315
1694	rs10161054
1695	rs2306283
1696	rs932494
1697	rs11125946
1698	rs4854053
1699	rs4887436
1700	rs5911181
1701	rs237866
1702	rs825184
1703	rs2852611
1704	rs28578891
1705	rs627777
1706	rs2256827
1707	rs913664
1708	rs3846994
1709	rs1507692
1710	rs4245643
1711	rs9319738
1712	rs2876257
1713	rs1475433
1714	rs2993871
1715	rs11696792
1716	rs11716371
1717	rs139897
1718	rs3779512
1719	rs4394356
1720	rs1549555
1721	rs6078121
1722	rs1627156
1723	rs361315
1724	rs1403543
1725	rs7175868
1726	rs28882838
1727	rs1244488
1728	rs12088155
1729	rs881708
1730	rs12191488
1731	rs3816411
1732	rs12561127
1733	rs1958978
1734	rs1395415
1735	rs559379
1736	rs2204758
1737	rs521757
1738	rs8111593
1739	rs11097354
1740	rs7202333
1741	rs2138733
1742	rs2352099
1743	rs937642
1744	rs2231563
1745	rs1018116
1746	rs1893835
1747	rs2072825
1748	rs1176529
1749	rs3852732
1750	rs2429127
1751	rs17064647
1752	rs597420
1753	rs10519249
1754	rs2859217
1755	rs10180549
1756	rs9394
1757	rs131476
1758	rs2395114
1759	rs3732652
1760	rs2462043
1761	rs2906173
1762	rs9294881
1763	rs9999979
1764	rs296721
1765	rs16992276
1766	rs13336802
1767	rs4805677
1768	rs2228497
1769	rs13295269
1770	rs2478832
1771	rs2846526
1772	rs1693210
1773	rs1196814
1774	rs4383635
1775	rs578026
1776	rs4029252
1777	rs4669173
1778	rs4958959
1779	rs10486275
1780	rs4491635
1781	rs9277003
1782	rs3788378
1783	rs10924779
1784	rs947007
1785	rs12495352
1786	rs2000434
1787	rs6528355
1788	rs7734272
1789	rs2879375
1790	rs2056865
1791	rs11591371
1792	rs1245531
1793	rs2622557
1794	rs2979742
1795	rs12639792
1796	rs2291687
1797	rs2420325
1798	rs12984410
1799	rs4724739
1800	rs1600074
1801	rs6893961
1802	rs1284518
1803	rs13107662
1804	rs1430916
1805	rs4312629
1806	rs2053506
1807	rs10805605
1808	rs844771
1809	rs4451226
1810	rs5927749
1811	rs12333614
1812	rs12607563
1813	rs2820397
1814	rs2582465
1815	rs1007838
1816	rs234792
1817	rs1979789
1818	rs6936438
1819	rs9268384
1820	rs2470996
1821	rs11864433
1822	rs7577143
1823	rs11126702
1824	rs1869829
1825	rs975360
1826	rs4819833
1827	rs12901853
1828	rs12911848
1829	rs4244205
1830	rs2394255
1831	rs6935921
1832	rs950772
1833	rs35040497
1834	rs2657197
1835	rs2075664
1836	rs867006
1837	rs7055107
1838	rs12569151
1839	rs10788037
1840	rs1577274
1841	rs7407770
1842	rs3781452
1843	rs1878534
1844	rs3765651
1845	rs7583428
1846	rs745685
1847	rs17247871
1848	rs5909551
1849	rs1889447
1850	rs9321768
1851	rs11896942
1852	rs7218003
1853	rs9887407
1854	rs12316126
1855	rs678892
1856	rs28519394
1857	rs1191818
1858	rs10120669
1859	rs7087951
1860	rs4890025
1861	rs1896797
1862	rs11081516
1863	rs402899
1864	rs7949225
1865	rs11954387
1866	rs1470461
1867	rs2266782
1868	rs4547545
1869	rs4715890
1870	rs6971088
1871	rs34598771
1872	rs266004
1873	rs6804162
1874	rs13152384
1875	rs7629158
1876	rs13089480
1877	rs4889356
1878	rs6552787
1879	rs8049367
1880	rs11060180
1881	rs5931272
1882	rs11215094
1883	rs9538627
1884	rs9905921
1885	rs7319441
1886	rs1483617
1887	rs3778312
1888	rs9634489
1889	rs12807540
1890	rs7755903
1891	rs12526935
1892	rs2374448
1893	rs13202473
1894	rs3861307
1895	rs2753867
1896	rs4291982
1897	rs6436860
1898	rs3873386
1899	rs4780177
1900	rs12027243
1901	rs4866279
1902	rs4836159
1903	rs9518498
1904	rs906684
1905	rs6926124
1906	rs7061667
1907	rs10254757
1908	rs6593499
1909	rs1989344
1910	rs2261759
1911	rs344386
1912	rs13414002
1913	rs6948749
1914	rs9952742
1915	rs1363896
1916	rs13328336
1917	rs934141
1918	rs872587
1919	rs8032549
1920	rs1379244
1921	rs4648011
1922	rs2484089
1923	rs7991983
1924	rs541667
1925	rs7924589
1926	rs1354296
1927	rs980040
1928	rs472465
1929	rs1757690
1930	rs2063348
1931	rs8099013
1932	rs868294
1933	rs4773686
1934	rs1933112
1935	rs911896
1936	rs1285439
1937	rs4074459
1938	rs10847446
1939	rs2672347
1940	rs1196816
1941	rs9478067
1942	rs603165
1943	rs12647565
1944	cnvi0009850
1945	rs2283650
1946	rs12965254
1947	rs2076224
1948	rs10914416
1949	rs9297393
1950	rs7501412
1951	rs1378602
1952	rs2343339
1953	rs28539058
1954	rs950166
1955	rs281286
1956	rs6663771
1957	rs7280016
1958	rs4280854
1959	rs11250031
1960	rs1374275
1961	rs582740
1962	rs2021559
1963	rs6608087
1964	rs9928993
1965	rs341815
1966	rs1436767
1967	rs479195
1968	rs1220597
1969	rs436162
1970	rs7330873
1971	rs6913797
1972	rs1789842
1973	rs707570
1974	rs12138480
1975	rs13138129
1976	rs3924889
1977	rs1471753
1978	rs4328759
1979	rs1323056
1980	rs9529902
1981	rs1371956
1982	rs1408470
1983	rs10808412
1984	rs7849833
1985	rs6581580
1986	rs9963410
1987	rs7144802
1988	rs1060411
1989	rs10737562
1990	rs1499100
1991	rs2140646
1992	rs907015
1993	rs9261394
1994	rs7825059
1995	rs2304580
1996	rs12546155
1997	cnvi0003658
1998	rs1021687
[truncated: 45,517 more rows]
